# Supplementary material for: Moisturizing and Antioxidant Effects of Artemisia argyi Essence Liquid in HaCaT Keratinocytes
Source: MDPI journal article supplement (doi:10.3390/ijms24076809), 2023-04-06
Supplement: s1 [file s1]

## *Supplementary Material*

**Supplementary Table S1. The content of flavonoids, polysaccharides, phenols in AL.**

| constituents              | Content(mg/mL) |
|---------------------------|----------------|
| Flavonoids (apigenin)     | 0.2 ± 0.02     |
| Terpene (oleanolic acid)  | 9.33 ± 0.59    |
| Polysaccharides (glucose) | 1.02 ± 0.02    |
| polyphenols (gallate)     | 0.31 ± 0.00    |

**Supplementary Table S2. Gene-specific primers.**

| Gene  | Forward (5' to 3')     | Reverse(5' to 3')      |
|-------|------------------------|------------------------|
| AQP3  | GGGGAGATGCTCCACATCC    | AAAGGCCAGGTTGATGGTGAG  |
| HAS2  | CTCTTTTGGACTGTATGGTGCC | AGGGTAGGTTAGCCTTTTCACA |
| HAS3  | CAGCCTATGTGACGGGCTAC   | CCTCCTGGTATGCGGCAAT    |
| TGM-1 | GCACCACACAGACGAGTATGA  | GGTGATGCGATCAGAGGATTC  |
| TJP-1 | ACCAGTAAGTCGTCCTGATCC  | TCGGCCAAATCTTCTCACTCC  |
| SOD2  | CTGCTGGGGATTGATGTGTGG  | TGCAAGCCATGTATCTTTCAGT |
| FLG   | GGACAGGAACAATCATCGGGG  | CAACCTCTCGGAGTCGTCTG   |

**Supplementary Table S2 (continued)**

| <b>Gene</b>    | <b>Forward (5' to 3')</b> | <b>Reverse(5' to 3')</b> |
|----------------|---------------------------|--------------------------|
| GPX1           | AGTCGGTGTATGCCTTCTCGG     | GCAGCTCGTTCATCTGGGTGTA   |
| Nrf2           | TCAGCGACGGAAAGAGTATGA     | CCACTGGTTTCTGACTGGATGT   |
| HO-1           | AAGACTGCGTTCCTGCTCAAC     | AAAGCCCTACAGCAACTGTCG    |
| $\beta$ -actin | AAATCGTGCGTGACATCAAAGA    | GCCATCTCCTGCTCGAAGTC     |
